# Supplementary material
Source: PubMed Central journal article supplement (PMC6147003)
Supplement: zam019188772s1.pdf [file zam019188772s1.pdf]

**Supplementary Table S1.** Relative percentage of volatile compounds (%) detected at the beginning and the end of cocoa beans fermentation identified by HS-SPME-GC-MS analysis produced from two different fermentation methods (Box and Heap) under different conditions (inoculated and non-inoculated). Values are expressed as mean  $\pm$  SD from triplicate determinations

|                                          |                              | BOX                   |                                    |                                    |                                    |                                    |                                    |                                    |    |   |  |
|------------------------------------------|------------------------------|-----------------------|------------------------------------|------------------------------------|------------------------------------|------------------------------------|------------------------------------|------------------------------------|----|---|--|
|                                          |                              | At the beginning (%)  |                                    |                                    | At the end (%)                     |                                    |                                    |                                    |    |   |  |
| Group                                    | Compounds                    | S                     | ST                                 | C                                  | S                                  | ST                                 | C                                  | S                                  | ST | C |  |
| ESTERS                                   | Ethyl acetate                | 7.73 $\pm$ 1.37       | 18.45 $\pm$ 5.58                   | 5.25 $\pm$ 0.45                    | 4.71 $\pm$ 3.37                    | 2.54 $\pm$ 0.65                    | 3.58 $\pm$ 1.13                    |                                    |    |   |  |
|                                          | Ethyl octanoate              | 0.03 $\pm$ 0.00       | 0.00 $\pm$ 0.00                    | 0.05 $\pm$ 0.01                    | 0.33 $\pm$ 0.06                    | 0.34 $\pm$ 0.06                    | 0.25 $\pm$ 0.07                    |                                    |    |   |  |
|                                          | Ethyl caproate               | 0.21 $\pm$ 0.03       | 0.18 $\pm$ 0.03                    | 0.11 $\pm$ 0.04                    | 0.45 $\pm$ 0.11                    | 0.43 $\pm$ 0.08                    | 0.29 $\pm$ 0.08                    |                                    |    |   |  |
|                                          | Methyl octanoate             | 0.11 $\pm$ 0.00       | 0.11 $\pm$ 0.01                    | 0.10 $\pm$ 0.03                    | 0.00 $\pm$ 0.00                    | 0.00 $\pm$ 0.00                    | 0.00 $\pm$ 0.00                    |                                    |    |   |  |
|                                          | Ethyl benzoate               | 0.00 $\pm$ 0.00       | 0.01 $\pm$ 0.00                    | 0.01 $\pm$ 0.00                    | 0.13 $\pm$ 0.02                    | 0.13 $\pm$ 0.04                    | 0.11 $\pm$ 0.05                    |                                    |    |   |  |
|                                          | Ethyl- $\alpha$ -toluate     | 0.00 $\pm$ 0.00       | 0.00 $\pm$ 0.00                    | 0.00 $\pm$ 0.00                    | 0.48 $\pm$ 0.07                    | 0.62 $\pm$ 0.19                    | 0.43 $\pm$ 0.10                    |                                    |    |   |  |
|                                          | 2-Pentanol, acetate          | 1.42 $\pm$ 0.56       | 2.55 $\pm$ 0.26                    | 1.75 $\pm$ 0.37                    | 3.93 $\pm$ 0.41                    | 2.45 $\pm$ 0.91                    | 3.85 $\pm$ 0.93                    |                                    |    |   |  |
|                                          | Isopentyl alcohol, acetate   | 1.09 $\pm$ 0.24       | 0.01 $\pm$ 0.00                    | 1.19 $\pm$ 0.13                    | 4.69 $\pm$ 0.83                    | 3.68 $\pm$ 0.64                    | 6.72 $\pm$ 2.21                    |                                    |    |   |  |
|                                          | Hexyl acetate                | 0.01 $\pm$ 0.01       | 0.01 $\pm$ 0.00                    | 0.00 $\pm$ 0.00                    | 0.03 $\pm$ 0.01                    | 0.00 $\pm$ 0.00                    | 0.00 $\pm$ 0.00                    |                                    |    |   |  |
|                                          | 2,3-butanediol diacetate     | 0.20 $\pm$ 0.10       | 0.30 $\pm$ 0.08                    | 0.14 $\pm$ 0.03                    | 0.03 $\pm$ 0.01                    | 0.05 $\pm$ 0.01                    | 0.06 $\pm$ 0.02                    |                                    |    |   |  |
|                                          | 1,2-propanediol, diacetate   | 6.61 $\pm$ 1.04       | 8.11 $\pm$ 1.55                    | 4.78 $\pm$ 0.24                    | 1.21 $\pm$ 0.45                    | 2.53 $\pm$ 0.67                    | 1.54 $\pm$ 0.94                    |                                    |    |   |  |
|                                          | $\beta$ -phenylethyl acetate | 0.03 $\pm$ 0.01       | 0.12 $\pm$ 0.04                    | 0.05 $\pm$ 0.01                    | 1.20 $\pm$ 0.20                    | 1.69 $\pm$ 0.57                    | 2.22 $\pm$ 1.60                    |                                    |    |   |  |
|                                          | Isoamyl benzoate             | 0.16 $\pm$ 0.10       | 0.14 $\pm$ 0.03                    | 0.28 $\pm$ 0.04                    | 0.10 $\pm$ 0.05                    | 0.02 $\pm$ 0.01                    | 0.03 $\pm$ 0.01                    |                                    |    |   |  |
|                                          | n-Hexyl butanoate            | 0.00 $\pm$ 0.00       | 0.05 $\pm$ 0.02                    | 0.00 $\pm$ 0.00                    | 0.00 $\pm$ 0.00                    | 0.00 $\pm$ 0.00                    | 0.00 $\pm$ 0.00                    |                                    |    |   |  |
|                                          |                              | <b>Total ester</b>    | <b>17.61 <math>\pm</math> 2.55</b> | <b>30.05 <math>\pm</math> 5.18</b> | <b>13.72 <math>\pm</math> 1.79</b> | <b>17.29 <math>\pm</math> 1.79</b> | <b>14.48 <math>\pm</math> 1.27</b> | <b>19.08 <math>\pm</math> 2.05</b> |    |   |  |
|                                          | ALDEHYDES                    | Hexanal               | 1.93 $\pm$ 0.02                    | 2.41 $\pm$ 0.12                    | 0.48 $\pm$ 0.03                    | 0.15 $\pm$ 0.04                    | 0.17 $\pm$ 0.04                    | 0.12 $\pm$ 0.03                    |    |   |  |
|                                          |                              | Benzaldehyde          | 0.41 $\pm$ 0.14                    | 0.55 $\pm$ 0.13                    | 0.17 $\pm$ 0.02                    | 0.63 $\pm$ 0.11                    | 0.73 $\pm$ 0.43                    | 0.78 $\pm$ 0.11                    |    |   |  |
| Benzeneacetaldehyde                      |                              | 5.57 $\pm$ 2.36       | 6.09 $\pm$ 0.90                    | 2.64 $\pm$ 0.14                    | 3.49 $\pm$ 0.45                    | 5.81 $\pm$ 2.54                    | 4.83 $\pm$ 0.63                    |                                    |    |   |  |
| $\alpha$ -ethylidene-benzeneacetaldehyde |                              | 0.00 $\pm$ 0.00       | 0.00 $\pm$ 0.00                    | 0.00 $\pm$ 0.00                    | 0.05 $\pm$ 0.01                    | 0.03 $\pm$ 0.01                    | 0.03 $\pm$ 0.03                    |                                    |    |   |  |
| <i>trans</i> -2-Undecenal                |                              | 0.00 $\pm$ 0.00       | 0.00 $\pm$ 0.00                    | 0.00 $\pm$ 0.00                    | 0.00 $\pm$ 0.00                    | 0.02 $\pm$ 0.01                    | 0.01 $\pm$ 0.00                    |                                    |    |   |  |
| Nonanal                                  |                              | 0.14 $\pm$ 0.05       | 0.15 $\pm$ 0.02                    | 0.28 $\pm$ 0.11                    | 0.09 $\pm$ 0.02                    | 0.14 $\pm$ 0.02                    | 0.17 $\pm$ 0.06                    |                                    |    |   |  |
| 2-methyl-butanal                         |                              | 0.96 $\pm$ 0.09       | 1.24 $\pm$ 0.15                    | 0.45 $\pm$ 0.01                    | 0.49 $\pm$ 0.15                    | 0.63 $\pm$ 0.35                    | 0.31 $\pm$ 0.11                    |                                    |    |   |  |
|                                          |                              | <b>Total aldehyde</b> | <b>9.00 <math>\pm</math> 2.01</b>  | <b>10.44 <math>\pm</math> 2.21</b> | <b>4.03 <math>\pm</math> 0.93</b>  | <b>4.91 <math>\pm</math> 1.25</b>  | <b>7.54 <math>\pm</math> 2.11</b>  | <b>6.27 <math>\pm</math> 1.75</b>  |    |   |  |
| ALCOHOLS                                 | 2-Pentanol                   | 47.70 $\pm$ 4.93      | 25.70 $\pm$ 5.70                   | 52.51 $\pm$ 1.43                   | 3.34 $\pm$ 1.10                    | 2.41 $\pm$ 1.28                    | 4.55 $\pm$ 0.28                    |                                    |    |   |  |
|                                          | 2-Heptanol                   | 0.39 $\pm$ 0.13       | 0.54 $\pm$ 0.05                    | 0.34 $\pm$ 0.05                    | 8.97 $\pm$ 3.01                    | 7.77 $\pm$ 1.85                    | 9.10 $\pm$ 2.05                    |                                    |    |   |  |
|                                          | ( <i>Z</i> )-3-Hexen-1-ol    | 0.04 $\pm$ 0.01       | 0.04 $\pm$ 0.01                    | 0.04 $\pm$ 0.01                    | 0.02 $\pm$ 0.00                    | 0.02 $\pm$ 0.00                    | 0.01 $\pm$ 0.01                    |                                    |    |   |  |
|                                          | 1-Hexanol                    | 0.30 $\pm$ 0.03       | 0.43 $\pm$ 0.12                    | 0.21 $\pm$ 0.06                    | 0.15 $\pm$ 0.03                    | 0.18 $\pm$ 0.03                    | 0.14 $\pm$ 0.08                    |                                    |    |   |  |
|                                          | 1-Octen-3-ol                 | 0.04 $\pm$ 0.04       | 0.05 $\pm$ 0.03                    | 0.00 $\pm$ 0.00                    | 0.00 $\pm$ 0.00                    | 0.00 $\pm$ 0.00                    | 0.19 $\pm$ 0.06                    |                                    |    |   |  |
|                                          | 1-Heptanol                   | 0.04 $\pm$ 0.01       | 0.05 $\pm$ 0.01                    | 0.05 $\pm$ 0.01                    | 0.00 $\pm$ 0.00                    | 0.00 $\pm$ 0.00                    | 0.00 $\pm$ 0.00                    |                                    |    |   |  |
|                                          | 2-ethyl-1-hexanol            | 0.31 $\pm$ 0.05       | 0.49 $\pm$ 0.16                    | 0.22 $\pm$ 0.02                    | 0.14 $\pm$ 0.02                    | 0.23 $\pm$ 0.03                    | 0.19 $\pm$ 0.01                    |                                    |    |   |  |
|                                          | 3-methyl-1-butanol           | 1.11 $\pm$ 0.05       | 1.30 $\pm$ 0.08                    | 0.87 $\pm$ 0.21                    | 1.31 $\pm$ 0.57                    | 1.04 $\pm$ 0.29                    | 1.66 $\pm$ 0.35                    |                                    |    |   |  |
|                                          |                              | 2-Hexanol             | 0.42 $\pm$ 0.03                    | 0.79 $\pm$ 0.09                    | 0.73 $\pm$ 0.07                    | 0.16 $\pm$ 0.02                    | 0.13 $\pm$ 0.06                    | 0.18 $\pm$ 0.04                    |    |   |  |

|               |                                    |                      |                     |                      |                     |                     |                     |
|---------------|------------------------------------|----------------------|---------------------|----------------------|---------------------|---------------------|---------------------|
|               | 1-Pentanol                         | 0.43 ± 0.15          | 0.83 ± 0.08         | 0.08 ± 0.02          | 0.10 ± 0.02         | 0.07 ± 0.03         | 0.11 ± 0.05         |
|               | 1-Octanol                          | 0.07 ± 0.01          | 0.06 ± 0.01         | 0.10 ± 0.03          | 0.13 ± 0.05         | 0.10 ± 0.02         | 0.11 ± 0.01         |
|               | Benzyl alcohol                     | 0.04 ± 0.00          | 0.05 ± 0.01         | 0.03 ± 0.01          | 0.03 ± 0.01         | 0.06 ± 0.02         | 0.04 ± 0.00         |
|               | Phenylethyl alcohol                | 0.44 ± 0.05          | 0.55 ± 0.13         | 0.25 ± 0.04          | 3.67 ± 0.47         | 6.57 ± 2.72         | 8.42 ± 1.69         |
|               | 1-Heptadecanol                     | 0.05 ± 0.02          | 0.03 ± 0.01         | 0.05 ± 0.02          | 0.10 ± 0.01         | 0.11 ± 0.02         | 0.07 ± 0.02         |
|               | Isobutanol                         | 1.54 ± 0.62          | 0.21 ± 0.07         | 0.07 ± 0.02          | 0.07 ± 0.02         | 0.07 ± 0.02         | 0.12 ± 0.04         |
|               | 1-Decanol                          | 0.01 ± 0.00          | 0.01 ± 0.00         | 0.00 ± 0.00          | 0.01 ± 0.00         | 0.01 ± 0.00         | 0.00 ± 0.00         |
|               | $\alpha$ -Methylbenzyl alcohol     | 0.32 ± 0.06          | 0.29 ± 0.10         | 0.65 ± 0.05          | 0.22 ± 0.02         | 0.33 ± 0.09         | 0.24 ± 0.05         |
|               | 1-Dodecanol                        | 0.05 ± 0.02          | 0.17 ± 0.04         | 0.23 ± 0.03          | 0.07 ± 0.02         | 0.24 ± 0.15         | 0.07 ± 0.02         |
|               | Ethanol                            | 2.17 ± 0.59          | 3.89 ± 0.58         | 2.47 ± 0.08          | 1.59 ± 0.25         | 1.25 ± 0.29         | 1.32 ± 0.25         |
|               | Decanal                            | 0.03 ± 0.01          | 0.05 ± 0.01         | 0.09 ± 0.02          | 0.02 ± 0.01         | 0.04 ± 0.02         | 0.03 ± 0.01         |
|               | <b>Total alcohol</b>               | <b>55.49 ± 10.59</b> | <b>35.52 ± 5.70</b> | <b>58.99 ± 11.68</b> | <b>20.08 ± 2.17</b> | <b>20.62 ± 2.19</b> | <b>26.57 ± 2.75</b> |
|               | 2-Pentanone                        | 2.01 ± 1.08          | 1.55 ± 0.35         | 7.49 ± 0.63          | 1.27 ± 0.43         | 2.05 ± 0.89         | 1.74 ± 0.13         |
|               | 2-Heptanone                        | 0.66 ± 0.05          | 0.69 ± 0.06         | 1.28 ± 0.06          | 1.76 ± 0.42         | 0.88 ± 1.15         | 1.57 ± 0.49         |
|               | Acetoin                            | 0.39 ± 0.11          | 0.47 ± 0.02         | 0.29 ± 0.03          | 4.42 ± 1.09         | 5.98 ± 1.39         | 4.52 ± 0.77         |
|               | 2-Nonanol                          | 0.05 ± 0.01          | 0.06 ± 0.01         | 0.04 ± 0.00          | 0.78 ± 0.20         | 0.34 ± 0.07         | 0.39 ± 0.04         |
|               | 2-Undecanone                       | 0.04 ± 0.00          | 0.04 ± 0.01         | 0.05 ± 0.01          | 0.02 ± 0.00         | 0.02 ± 0.00         | 0.04 ± 0.00         |
|               | Acetophenone                       | 1.17 ± 0.32          | 1.88 ± 0.73         | 4.94 ± 0.51          | 0.81 ± 0.18         | 1.16 ± 0.37         | 0.84 ± 0.17         |
|               | 2-Tetradecanone                    | 0.00 ± 0.00          | 0.00 ± 0.00         | 0.00 ± 0.00          | 0.00 ± 0.00         | 0.00 ± 0.00         | 0.00 ± 0.00         |
|               | Dodecanal                          | 0.02 ± 0.00          | 0.00 ± 0.00         | 0.01 ± 0.00          | 0.00 ± 0.00         | 0.00 ± 0.00         | 0.00 ± 0.00         |
| <b>KETONE</b> | <b>Total ketone</b>                | <b>4.33 ± 0.72</b>   | <b>4.68 ± 0.74</b>  | <b>14.10 ± 2.86</b>  | <b>9.07 ± 1.48</b>  | <b>10.44 ± 2.02</b> | <b>9.10 ± 1.53</b>  |
|               | $\beta$ - <i>trans</i> -Ocimene    | 0.13 ± 0.01          | 0.34 ± 0.07         | 0.12 ± 0.02          | 0.35 ± 0.05         | 0.06 ± 0.02         | 0.12 ± 0.06         |
|               | Sabinene                           | 0.09 ± 0.01          | 0.17 ± 0.03         | 0.05 ± 0.00          | 0.21 ± 0.04         | 0.05 ± 0.00         | 0.08 ± 0.01         |
|               | $\beta$ -Myrcene                   | 2.08 ± 0.30          | 2.32 ± 0.29         | 1.99 ± 0.32          | 1.69 ± 0.11         | 0.96 ± 0.09         | 1.22 ± 0.33         |
|               | D-Limonene                         | 8.36 ± 1.58          | 12.37 ± 0.88        | 5.20 ± 0.49          | 19.17 ± 3.64        | 6.43 ± 0.59         | 12.39 ± 6.26        |
|               | <i>cis</i> -furan Linalool oxide   | 0.10 ± 0.07          | 0.09 ± 0.01         | 0.05 ± 0.01          | 0.09 ± 0.02         | 0.00 ± 0.00         | 0.04 ± 0.05         |
|               | Limonene epoxide                   | 0.67 ± 0.51          | 0.90 ± 0.04         | 0.34 ± 0.01          | 0.02 ± 0.01         | 0.00 ± 0.00         | 0.00 ± 0.00         |
|               | $\alpha$ -Citral                   | 0.03 ± 0.02          | 0.06 ± 0.01         | 0.01 ± 0.00          | 0.02 ± 0.00         | 0.09 ± 0.02         | 0.10 ± 0.01         |
|               | $\beta$ -Caryophyllene             | 0.02 ± 0.00          | 0.02 ± 0.01         | 0.01 ± 0.00          | 0.01 ± 0.00         | 0.02 ± 0.01         | 0.02 ± 0.01         |
|               | $\alpha$ -Caryophyllene            | 0.08 ± 0.01          | 0.09 ± 0.02         | 0.07 ± 0.01          | 0.07 ± 0.01         | 0.08 ± 0.03         | 0.12 ± 0.03         |
|               | <i>cis</i> -pyranoid-linalyl oxide | 0.11 ± 0.03          | 0.15 ± 0.04         | 0.06 ± 0.01          | 0.06 ± 0.02         | 0.12 ± 0.03         | 0.08 ± 0.01         |
|               | Carveol                            | 0.04 ± 0.03          | 0.05 ± 0.00         | 0.02 ± 0.00          | 0.00 ± 0.00         | 0.00 ± 0.00         | 0.00 ± 0.00         |
|               | <i>cis</i> -Geranylacetone         | 0.02 ± 0.01          | 0.04 ± 0.01         | 0.02 ± 0.00          | 0.00 ± 0.00         | 0.00 ± 0.00         | 0.00 ± 0.00         |
|               | $\alpha$ -Limonene diepoxide       | 0.01 ± 0.00          | 0.02 ± 0.01         | 0.00 ± 0.00          | 0.00 ± 0.00         | 0.00 ± 0.00         | 0.00 ± 0.00         |
| <b>TERPEN</b> | <b>Total terperne</b>              | <b>11.74 ± 2.31</b>  | <b>16.62 ± 3.39</b> | <b>7.94 ± 1.48</b>   | <b>21.69 ± 5.28</b> | <b>7.81 ± 1.77</b>  | <b>14.18 ± 3.41</b> |
|               | Acetic acid                        | 0.69 ± 0.32          | 1.30 ± 0.31         | 0.72 ± 0.18          | 22.49 ± 1.74        | 28.40 ± 8.88        | 21.09 ± 9.24        |
|               | Isobutyric acid                    | 0.00 ± 0.00          | 0.00 ± 0.00         | 0.00 ± 0.00          | 0.09 ± 0.03         | 0.28 ± 0.02         | 0.10 ± 0.03         |
|               | Isovaleric acid                    | 0.06 ± 0.04          | 0.10 ± 0.02         | 0.04 ± 0.01          | 3.51 ± 0.65         | 9.20 ± 2.28         | 2.31 ± 0.42         |
| <b>ACIDS</b>  | Hexanoic acid                      | 0.39 ± 0.08          | 0.23 ± 0.00         | 0.08 ± 0.01          | 0.36 ± 0.05         | 0.46 ± 0.11         | 0.25 ± 0.02         |

|                |                                       |               |             |               |             |               |             |                |             |                |              |                |             |
|----------------|---------------------------------------|---------------|-------------|---------------|-------------|---------------|-------------|----------------|-------------|----------------|--------------|----------------|-------------|
|                | <b>Heptanoic acid</b>                 | 0.04 ±        | 0.01        | 0.00 ±        | 0.00        | 0.02 ±        | 0.01        | 0.05 ±         | 0.01        | 0.07 ±         | 0.01         | 0.04 ±         | 0.00        |
|                | <b>Octanoic Acid</b>                  | 0.04 ±        | 0.01        | 0.03 ±        | 0.00        | 0.05 ±        | 0.01        | 0.15 ±         | 0.02        | 0.19 ±         | 0.05         | 0.09 ±         | 0.01        |
|                | <b>Total acids</b>                    | <b>1.23 ±</b> | <b>0.28</b> | <b>1.67 ±</b> | <b>0.51</b> | <b>0.91 ±</b> | <b>0.28</b> | <b>26.66 ±</b> | <b>8.94</b> | <b>38.58 ±</b> | <b>11.34</b> | <b>23.88 ±</b> | <b>8.43</b> |
|                | <b>Phenol</b>                         | 0.02 ±        | 0.00        | 0.03 ±        | 0.00        | 0.02 ±        | 0.00        | 0.02 ±         | 0.00        | 0.06 ±         | 0.02         | 0.03 ±         | 0.00        |
|                | <b>o-Guaiacol</b>                     | 0.00 ±        | 0.00        | 0.00 ±        | 0.00        | 0.00 ±        | 0.00        | 0.02 ±         | 0.00        | 0.04 ±         | 0.01         | 0.02 ±         | 0.01        |
| <b>PHENOLS</b> | <b>Total phenols</b>                  | <b>0.02 ±</b> | <b>0.01</b> | <b>0.03 ±</b> | <b>0.02</b> | <b>0.02 ±</b> | <b>0.01</b> | <b>0.04 ±</b>  | <b>0.01</b> | <b>0.10 ±</b>  | <b>0.01</b>  | <b>0.05 ±</b>  | <b>0.01</b> |
|                | <b>2-butoxy-ethanol</b>               | 0.57 ±        | 0.22        | 0.97 ±        | 0.14        | 0.30 ±        | 0.02        | 0.24 ±         | 0.04        | 0.40 ±         | 0.09         | 0.85 ±         | 0.29        |
|                | <b>trans-methyl dihydro jasmonate</b> | 0.03 ±        | 0.02        | 0.04 ±        | 0.00        | 0.02 ±        | 0.15        | 0.02 ±         | 0.00        | 0.02 ±         | 0.01         | 0.01 ±         | 0.00        |
| <b>OTHERS</b>  | <b>Total others</b>                   | <b>0.60 ±</b> | <b>0.38</b> | <b>1.01 ±</b> | <b>0.66</b> | <b>0.32 ±</b> | <b>0.20</b> | <b>0.25 ±</b>  | <b>0.15</b> | <b>0.42 ±</b>  | <b>0.27</b>  | <b>0.86 ±</b>  | <b>0.59</b> |

|           |                                          | HEAP                 |             |                |             |                |             |                |             |                |             |                |             |
|-----------|------------------------------------------|----------------------|-------------|----------------|-------------|----------------|-------------|----------------|-------------|----------------|-------------|----------------|-------------|
|           |                                          | At the beginning (%) |             |                |             |                |             | At the end (%) |             |                |             |                |             |
| Groups    | Compounds                                | S                    |             | ST             |             | C              |             | S              |             | ST             |             | C              |             |
|           | Ethyl acetate                            | 11.92 ±              | 0.66        | 5.92 ±         | 0.63        | 5.52 ±         | 0.74        | 4.67 ±         | 1.24        | 4.88 ±         | 1.22        | 0.96 ±         | 0.43        |
|           | Ethyl octanoate                          | 0.06 ±               | 0.00        | 0.03 ±         | 0.01        | 0.36 ±         | 0.04        | 0.33 ±         | 0.09        | 0.85 ±         | 0.26        | 0.34 ±         | 0.15        |
|           | Ethyl caproate                           | 0.30 ±               | 0.00        | 0.22 ±         | 0.01        | 1.17 ±         | 0.05        | 0.53 ±         | 0.13        | 0.94 ±         | 0.16        | 0.09 ±         | 0.02        |
|           | Methyl octanoate                         | 0.17 ±               | 0.01        | 0.15 ±         | 0.01        | 0.00 ±         | 0.00        | 0.00 ±         | 0.00        | 0.00 ±         | 0.00        | 0.00 ±         | 0.00        |
|           | Ethyl benzoate                           | 0.04 ±               | 0.02        | 0.02 ±         | 0.01        | 1.38 ±         | 0.18        | 0.21 ±         | 0.06        | 0.24 ±         | 0.04        | 0.14 ±         | 0.01        |
|           | Ethyl- <i>α</i> -toluate                 | 0.03 ±               | 0.06        | 0.00 ±         | 0.00        | 0.00 ±         | 0.00        | 0.33 ±         | 0.10        | 0.50 ±         | 0.08        | 1.02 ±         | 0.19        |
|           | 2-Pentanol, acetate                      | 0.97 ±               | 0.03        | 1.52 ±         | 0.49        | 1.42 ±         | 0.65        | 1.78 ±         | 0.42        | 2.80 ±         | 0.13        | 0.37 ±         | 0.18        |
|           | Isopentyl alcohol, acetate               | 1.11 ±               | 0.06        | 0.94 ±         | 0.22        | 0.23 ±         | 0.02        | 2.53 ±         | 0.46        | 4.35 ±         | 0.04        | 0.05 ±         | 0.02        |
|           | Hexyl acetate                            | 0.02 ±               | 0.00        | 0.00 ±         | 0.00        | 0.04 ±         | 0.00        | 0.04 ±         | 0.01        | 0.00 ±         | 0.00        | 0.00 ±         | 0.00        |
|           | 2,3-butanediol diacetate                 | 0.20 ±               | 0.02        | 0.15 ±         | 0.04        | 3.26 ±         | 0.43        | 1.20 ±         | 0.32        | 0.03 ±         | 0.01        | 1.90 ±         | 0.24        |
|           | 1,2-propanediol, diacetate               | 10.49 ±              | 0.78        | 7.78 ±         | 2.22        | 2.27 ±         | 0.09        | 2.22 ±         | 0.56        | 1.88 ±         | 0.13        | 3.65 ±         | 0.44        |
|           | $\beta$ -phenylethyl acetate             | 0.33 ±               | 0.08        | 0.05 ±         | 0.00        | 0.12 ±         | 0.02        | 0.85 ±         | 0.24        | 0.73 ±         | 0.07        | 1.19 ±         | 0.14        |
|           | Isoamyl benzoate                         | 0.06 ±               | 0.00        | 0.10 ±         | 0.02        | 0.06 ±         | 0.00        | 0.56 ±         | 0.15        | 0.09 ±         | 0.02        | 0.13 ±         | 0.03        |
|           | n-Hexyl butanoate                        | 0.11 ±               | 0.05        | 0.02 ±         | 0.01        | 0.00 ±         | 0.00        | 0.00 ±         | 0.00        | 0.00 ±         | 0.00        | 0.00 ±         | 0.00        |
| ESTERS    | Total ester                              | <b>25.82 ±</b>       | <b>3.99</b> | <b>16.89 ±</b> | <b>2.46</b> | <b>15.82 ±</b> | <b>1.61</b> | <b>15.26 ±</b> | <b>1.32</b> | <b>17.29 ±</b> | <b>1.65</b> | <b>9.84 ±</b>  | <b>1.03</b> |
|           | Hexanal                                  | 0.39 ±               | 0.01        | 0.40 ±         | 0.11        | 2.77 ±         | 0.13        | 0.21 ±         | 0.03        | 0.24 ±         | 0.02        | 0.30 ±         | 0.04        |
|           | Benzaldehyde                             | 0.68 ±               | 0.11        | 0.21 ±         | 0.04        | 0.76 ±         | 0.05        | 0.75 ±         | 0.24        | 0.59 ±         | 0.09        | 1.20 ±         | 0.26        |
|           | Benzeneacetaldehyde                      | 7.25 ±               | 0.30        | 4.06 ±         | 0.59        | 5.24 ±         | 0.15        | 12.37 ±        | 3.88        | 5.71 ±         | 0.83        | 11.95 ±        | 1.43        |
|           | $\alpha$ -ethylidene-benzeneacetaldehyde | 0.00 ±               | 0.00        | 0.00 ±         | 0.00        | 0.00 ±         | 0.00        | 0.00 ±         | 0.00        | 0.03 ±         | 0.00        | 0.01 ±         | 0.01        |
|           | <i>trans</i> -2-Undecenal                | 0.00 ±               | 0.00        | 0.01 ±         | 0.01        | 0.00 ±         | 0.00        | 0.03 ±         | 0.01        | 0.05 ±         | 0.01        | 0.05 ±         | 0.01        |
|           | Nonanal                                  | 0.16 ±               | 0.01        | 0.16 ±         | 0.07        | 0.52 ±         | 0.22        | 0.12 ±         | 0.02        | 0.13 ±         | 0.05        | 0.26 ±         | 0.07        |
|           | 2-methyl-butanal                         | 1.16 ±               | 0.08        | 0.70 ±         | 0.05        | 1.02 ±         | 0.14        | 1.46 ±         | 0.34        | 0.73 ±         | 0.01        | 1.34 ±         | 0.06        |
| ALDEHYDES | Total aldehyde                           | <b>9.65 ±</b>        | <b>2.62</b> | <b>5.53 ±</b>  | <b>1.46</b> | <b>10.30 ±</b> | <b>1.91</b> | <b>14.94 ±</b> | <b>4.54</b> | <b>7.49 ±</b>  | <b>2.07</b> | <b>15.11 ±</b> | <b>4.35</b> |
|           | 2-Pentanol                               | 20.89 ±              | 0.67        | 44.15 ±        | 2.25        | 0.72 ±         | 0.14        | 1.52 ±         | 0.31        | 4.32 ±         | 0.12        | 0.13 ±         | 0.01        |
|           | 2-Heptanol                               | 0.47 ±               | 0.02        | 0.35 ±         | 0.06        | 1.94 ±         | 0.10        | 2.48 ±         | 0.58        | 7.99 ±         | 0.43        | 0.07 ±         | 0.03        |
|           | ( <i>Z</i> )-3-Hexen-1-ol                | 0.05 ±               | 0.00        | 0.04 ±         | 0.00        | 0.12 ±         | 0.00        | 0.02 ±         | 0.01        | 0.01 ±         | 0.00        | 0.01 ±         | 0.00        |
|           | 1-Hexanol                                | 0.32 ±               | 0.02        | 0.21 ±         | 0.00        | 1.32 ±         | 0.04        | 0.18 ±         | 0.04        | 0.22 ±         | 0.01        | 0.20 ±         | 0.01        |
|           | 1-Octen-3-ol                             | 0.05 ±               | 0.00        | 0.03 ±         | 0.00        | 0.00 ±         | 0.00        | 0.18 ±         | 0.05        | 0.00 ±         | 0.00        | 0.00 ±         | 0.00        |
|           | 1-Heptanol                               | 0.04 ±               | 0.01        | 0.05 ±         | 0.02        | 0.16 ±         | 0.01        | 0.00 ±         | 0.00        | 0.00 ±         | 0.00        | 0.00 ±         | 0.00        |
|           | 2-ethyl-1-hexanol                        | 0.50 ±               | 0.01        | 0.38 ±         | 0.05        | 1.00 ±         | 0.02        | 0.28 ±         | 0.07        | 0.34 ±         | 0.01        | 0.65 ±         | 0.04        |
|           | 3-methyl-1-butanol                       | 1.42 ±               | 0.06        | 1.11 ±         | 0.03        | 1.23 ±         | 0.15        | 0.88 ±         | 0.17        | 1.86 ±         | 0.05        | 0.19 ±         | 0.05        |
|           | 2-Hexanol                                | 0.74 ±               | 0.02        | 1.13 ±         | 0.05        | 0.00 ±         | 0.00        | 0.07 ±         | 0.01        | 0.18 ±         | 0.01        | 0.02 ±         | 0.00        |
|           | 1-Pentanol                               | 0.29 ±               | 0.07        | 0.13 ±         | 0.04        | 0.78 ±         | 0.21        | 0.14 ±         | 0.03        | 0.14 ±         | 0.07        | 0.28 ±         | 0.13        |
|           | 1-Octanol                                | 0.07 ±               | 0.00        | 0.09 ±         | 0.01        | 0.49 ±         | 0.01        | 0.09 ±         | 0.02        | 0.17 ±         | 0.02        | 0.23 ±         | 0.01        |
|           | Benzyl alcohol                           | 0.06 ±               | 0.00        | 0.04 ±         | 0.01        | 0.08 ±         | 0.00        | 0.06 ±         | 0.02        | 0.07 ±         | 0.01        | 0.11 ±         | 0.02        |
| ALCOHOLS  | Phenylethyl alcohol                      | 1.26 ±               | 0.12        | 0.31 ±         | 0.04        | 0.74 ±         | 0.04        | 4.52 ±         | 1.26        | 5.61 ±         | 0.89        | 8.29 ±         | 1.39        |

|                |                                             |                     |                     |                      |                     |                     |                      |
|----------------|---------------------------------------------|---------------------|---------------------|----------------------|---------------------|---------------------|----------------------|
|                | <b>1-Heptadecanol</b>                       | 0.10 ± 0.06         | 0.10 ± 0.08         | 0.12 ± 0.03          | 0.06 ± 0.02         | 0.21 ± 0.02         | 0.21 ± 0.07          |
|                | <b>Isobutanol</b>                           | 0.14 ± 0.03         | 0.10 ± 0.05         | 2.23 ± 0.20          | 0.06 ± 0.02         | 0.14 ± 0.07         | 0.03 ± 0.02          |
|                | <b>1-Decanol</b>                            | 0.01 ± 0.00         | 0.01 ± 0.00         | 0.01 ± 0.00          | 0.01 ± 0.00         | 0.01 ± 0.00         | 0.01 ± 0.00          |
|                | <b><i>α</i>-Methylbenzyl alcohol</b>        | 0.57 ± 0.02         | 0.55 ± 0.07         | 0.53 ± 0.01          | 0.30 ± 0.08         | 0.34 ± 0.05         | 0.52 ± 0.08          |
|                | <b>1-Dodecanol</b>                          | 0.06 ± 0.02         | 0.02 ± 0.01         | 0.54 ± 0.15          | 0.05 ± 0.01         | 0.38 ± 0.17         | 0.49 ± 0.23          |
|                | <b>Ethanol</b>                              | 3.72 ± 0.09         | 3.08 ± 0.32         | 2.52 ± 0.32          | 2.78 ± 0.52         | 3.81 ± 0.19         | 0.45 ± 0.07          |
|                | <b>Decanal</b>                              | 0.08 ± 0.01         | 0.06 ± 0.02         | 0.09 ± 0.04          | 0.02 ± 0.00         | 0.03 ± 0.00         | 0.05 ± 0.02          |
|                | <b>Total alcohol</b>                        | <b>30.85 ± 4.63</b> | <b>51.93 ± 9.81</b> | <b>14.61 ± 0.77</b>  | <b>13.70 ± 1.22</b> | <b>25.83 ± 2.28</b> | <b>11.93 ± 1.82</b>  |
|                | <b>2-Pentanone</b>                          | 1.75 ± 0.15         | 9.73 ± 1.21         | 0.96 ± 0.06          | 1.01 ± 0.23         | 2.23 ± 0.07         | 3.52 ± 0.24          |
|                | <b>2-Heptanone</b>                          | 0.93 ± 0.04         | 1.28 ± 0.05         | 1.07 ± 0.17          | 1.97 ± 0.41         | 3.61 ± 0.32         | 0.13 ± 0.03          |
|                | <b>Acetoin</b>                              | 0.48 ± 0.05         | 0.38 ± 0.01         | 1.88 ± 0.09          | 1.23 ± 0.24         | 2.65 ± 0.02         | 4.09 ± 0.24          |
|                | <b>2-Nonanol</b>                            | 0.07 ± 0.00         | 0.04 ± 0.00         | 0.08 ± 0.01          | 0.16 ± 0.04         | 0.46 ± 0.05         | 1.21 ± 0.16          |
|                | <b>2-Undecanone</b>                         | 0.08 ± 0.00         | 0.05 ± 0.01         | 0.14 ± 0.01          | 0.03 ± 0.01         | 0.00 ± 0.00         | 0.14 ± 0.02          |
|                | <b>Acetophenone</b>                         | 2.29 ± 0.04         | 3.06 ± 0.59         | 1.46 ± 0.04          | 1.79 ± 0.55         | 2.31 ± 0.43         | 1.23 ± 0.25          |
|                | <b>2-Tetradecanone</b>                      | 0.01 ± 0.00         | 0.00 ± 0.00         | 0.01 ± 0.01          | 0.00 ± 0.00         | 0.00 ± 0.00         | 0.00 ± 0.00          |
|                | <b>Dodecanal</b>                            | 0.04 ± 0.00         | 0.00 ± 0.00         | 0.03 ± 0.01          | 0.00 ± 0.00         | 0.01 ± 0.00         | 0.00 ± 0.00          |
| <b>KETONE</b>  | <b>Total ketone</b>                         | <b>5.65 ± 0.88</b>  | <b>14.54 ± 3.37</b> | <b>5.63 ± 0.74</b>   | <b>6.20 ± 0.83</b>  | <b>11.28 ± 1.45</b> | <b>10.32 ± 1.64</b>  |
|                | <b><i>β</i>-trans-Ocimene</b>               | 0.32 ± 0.01         | 0.08 ± 0.01         | 0.28 ± 0.02          | 0.51 ± 0.12         | 0.37 ± 0.04         | 0.04 ± 0.01          |
|                | <b>Sabinene</b>                             | 0.21 ± 0.01         | 0.05 ± 0.00         | 0.25 ± 0.05          | 0.30 ± 0.06         | 0.17 ± 0.02         | 0.02 ± 0.01          |
|                | <b><i>β</i>-Myrcene</b>                     | 4.50 ± 0.13         | 1.98 ± 0.16         | 3.51 ± 0.21          | 3.14 ± 0.63         | 2.31 ± 0.43         | 3.26 ± 0.27          |
|                | <b>D-Limonene</b>                           | 18.46 ± 0.81        | 6.65 ± 0.63         | 38.55 ± 1.85         | 30.60 ± 6.00        | 17.38 ± 2.88        | 4.56 ± 0.62          |
|                | <b><i>cis</i>-furan Linalool oxide</b>      | 0.04 ± 0.00         | 0.03 ± 0.01         | 0.18 ± 0.00          | 0.10 ± 0.02         | 0.10 ± 0.04         | 0.10 ± 0.02          |
|                | <b>Limonene epoxide</b>                     | 0.62 ± 0.06         | 0.29 ± 0.10         | 5.04 ± 0.22          | 0.00 ± 0.00         | 0.00 ± 0.00         | 0.00 ± 0.00          |
|                | <b><i>α</i>-Citral</b>                      | 0.07 ± 0.00         | 0.10 ± 0.02         | 0.07 ± 0.03          | 0.08 ± 0.02         | 0.15 ± 0.02         | 0.19 ± 0.02          |
|                | <b><i>β</i>-Caryophyllene</b>               | 0.03 ± 0.00         | 0.02 ± 0.01         | 0.10 ± 0.00          | 0.02 ± 0.00         | 0.03 ± 0.02         | 0.12 ± 0.01          |
|                | <b><i>α</i>-Caryophyllene</b>               | 0.15 ± 0.00         | 0.09 ± 0.05         | 0.41 ± 0.01          | 0.12 ± 0.03         | 0.18 ± 0.02         | 0.86 ± 0.09          |
|                | <b><i>cis</i>- pyranoid-linalylol oxide</b> | 0.14 ± 0.01         | 0.10 ± 0.03         | 0.18 ± 0.01          | 0.13 ± 0.03         | 0.17 ± 0.02         | 0.24 ± 0.04          |
|                | <b>Carveol</b>                              | 0.03 ± 0.00         | 0.01 ± 0.00         | 0.54 ± 0.04          | 0.00 ± 0.00         | 0.00 ± 0.00         | 0.00 ± 0.00          |
|                | <b><i>cis</i>-Geranylacetone</b>            | 0.00 ± 0.00         | 0.02 ± 0.01         | 0.00 ± 0.00          | 0.00 ± 0.00         | 0.00 ± 0.00         | 0.00 ± 0.00          |
|                | <b><i>α</i>-Limonene diepoxide</b>          | 0.04 ± 0.01         | 0.00 ± 0.00         | 0.05 ± 0.01          | 0.01 ± 0.00         | 0.02 ± 0.00         | 0.00 ± 0.00          |
| <b>TERPEN</b>  | <b>Total terperne</b>                       | <b>24.62 ± 5.12</b> | <b>9.42 ± 1.86</b>  | <b>49.17 ± 10.56</b> | <b>35.00 ± 8.43</b> | <b>20.86 ± 4.78</b> | <b>9.40 ± 1.46</b>   |
|                | <b>Acetic acid</b>                          | 1.00 ± 0.16         | 0.68 ± 0.27         | 1.06 ± 0.39          | 4.33 ± 1.25         | 6.35 ± 0.74         | 17.88 ± 3.14         |
|                | <b>Isobutyric acid</b>                      | 0.00 ± 0.00         | 0.00 ± 0.00         | 0.00 ± 0.00          | 0.46 ± 0.11         | 0.46 ± 0.07         | 0.48 ± 0.21          |
|                | <b>Isovaleric acid</b>                      | 0.09 ± 0.02         | 0.05 ± 0.01         | 0.19 ± 0.04          | 8.07 ± 2.00         | 8.09 ± 0.33         | 22.33 ± 3.88         |
|                | <b>Hexanoic acid</b>                        | 0.96 ± 0.19         | 0.20 ± 0.08         | 0.62 ± 0.31          | 0.43 ± 0.09         | 0.38 ± 0.08         | 0.83 ± 0.23          |
|                | <b>Heptanoic acid</b>                       | 0.13 ± 0.03         | 0.00 ± 0.00         | 0.07 ± 0.04          | 0.08 ± 0.03         | 0.09 ± 0.02         | 0.14 ± 0.05          |
|                | <b>Octanoic Acid</b>                        | 0.07 ± 0.04         | 0.06 ± 0.02         | 0.11 ± 0.07          | 0.11 ± 0.07         | 0.27 ± 0.06         | 0.34 ± 0.11          |
| <b>ACIDS</b>   | <b>Total acids</b>                          | <b>2.26 ± 0.47</b>  | <b>0.99 ± 0.26</b>  | <b>2.06 ± 0.42</b>   | <b>13.49 ± 3.29</b> | <b>15.64 ± 3.62</b> | <b>41.99 ± 10.25</b> |
| <b>PHENOLS</b> | <b>Phenol</b>                               | 0.04 ± 0.00         | 0.03 ± 0.01         | 0.03 ± 0.00          | 0.35 ± 0.09         | 0.37 ± 0.05         | 0.27 ± 0.04          |

|               |                                       |               |             |               |             |               |             |               |             |               |             |               |             |
|---------------|---------------------------------------|---------------|-------------|---------------|-------------|---------------|-------------|---------------|-------------|---------------|-------------|---------------|-------------|
|               | <b>o-Guaiacol</b>                     | 0.00 ±        | 0.00        | 0.01 ±        | 0.00        | 0.00 ±        | 0.00        | 0.58 ±        | 0.17        | 0.62 ±        | 0.09        | 0.23 ±        | 0.04        |
|               | <b>Total phenols</b>                  | <b>0.04 ±</b> | <b>0.02</b> | <b>0.04 ±</b> | <b>0.02</b> | <b>0.03 ±</b> | <b>0.02</b> | <b>0.93 ±</b> | <b>0.16</b> | <b>0.99 ±</b> | <b>0.18</b> | <b>0.50 ±</b> | <b>0.03</b> |
|               | <b>2-butoxy-ethanol</b>               | 1.10 ±        | 0.12        | 0.67 ±        | 0.08        | 2.36 ±        | 0.65        | 0.45 ±        | 0.11        | 0.58 ±        | 0.05        | 0.86 ±        | 0.04        |
|               | <b>trans-methyl dihydro jasmonate</b> | 0.05 ±        | 0.03        | 0.02 ±        | 0.01        | 0.05 ±        | 0.01        | 0.02 ±        | 0.01        | 0.04 ±        | 0.00        | 0.04 ±        | 0.01        |
| <b>OTHERS</b> | <b>Total others</b>                   | <b>1.15 ±</b> | <b>0.74</b> | <b>0.69 ±</b> | <b>0.46</b> | <b>2.40 ±</b> | <b>1.63</b> | <b>0.47 ±</b> | <b>0.30</b> | <b>0.62 ±</b> | <b>0.39</b> | <b>0.90 ±</b> | <b>0.58</b> |

S2. Yeast community of fermented cocoa beans

| Samples | Type | Time | Condition                          | Chao1   | Shannon index (H') | Observed species | ESC (%) |
|---------|------|------|------------------------------------|---------|--------------------|------------------|---------|
| A1T2    | Box  | T48  | <i>S. cerevisiae</i>               | 736.42  | 3.32               | 310              | 97.17   |
| A1T4    | Box  | T96  | <i>S. cerevisiae</i>               | 665.32  | 3.29               | 255              | 97.64   |
| A1T5    | Box  | T120 | <i>S. cerevisiae</i>               | 667     | 3.56               | 243              | 97.64   |
| A3T0    | Heap | T0   | <i>S. cerevisiae</i>               | 813.47  | 3.19               | 270              | 97.24   |
| A3T2    | Heap | T48  | <i>S. cerevisiae</i>               | 1135.47 | 3.01               | 259              | 97.3    |
| A3T4    | Heap | T96  | <i>S. cerevisiae</i>               | 720.06  | 2.48               | 188              | 98.01   |
| A3T5    | Heap | T120 | <i>S. cerevisiae</i>               | 530.5   | 2.45               | 203              | 98.07   |
| B1T2    | Box  | T48  | <i>S. cerevisiae_T.delbrueckii</i> | 614     | 3.53               | 276              | 97.51   |
| B1T4    | Box  | T96  | <i>S. cerevisiae_T.delbrueckii</i> | 771.61  | 3.73               | 315              | 97.14   |
| B1T5    | Box  | T120 | <i>S. cerevisiae_T.delbrueckii</i> | 705.92  | 4.62               | 302              | 97.37   |
| B3T0    | Heap | T0   | <i>S. cerevisiae_T.delbrueckii</i> | 828.09  | 3.55               | 284              | 97.2    |
| B3T2    | Heap | T48  | <i>S. cerevisiae_T.delbrueckii</i> | 851.24  | 3.71               | 277              | 97.3    |
| B3T5    | Heap | T120 | <i>S. cerevisiae_T.delbrueckii</i> | 1418.25 | 4.16               | 402              | 96      |
| C1T0    | Box  | T0   | <i>Non_inoculated</i>              | 451.81  | 2.94               | 230              | 97.98   |
| C1T2    | Box  | T48  | <i>Non_inoculated</i>              | 718.9   | 3.36               | 298              | 97.29   |
| C1T4    | Box  | T96  | <i>Non_inoculated</i>              | 744.06  | 4.12               | 342              | 97.06   |
| C1T5    | Box  | T120 | <i>Non_inoculated</i>              | 672.6   | 3.21               | 267              | 97.51   |
| C3T0    | Heap | T0   | <i>Non_inoculated</i>              | 565.33  | 2.94               | 264              | 97.54   |
| C3T2    | Heap | T48  | <i>Non_inoculated</i>              | 455.89  | 2.15               | 187              | 98.21   |
| C3T4    | Heap | T96  | <i>Non_inoculated</i>              | 1541    | 4.51               | 471              | 95.26   |
| C3T5    | Heap | T120 | <i>Non_inoculated</i>              | 1279.44 | 3.77               | 353              | 96.4    |
| A2T0    | Box  | T0   | <i>S. cerevisiae</i>               | 900.88  | 4.41               | 347              | 96.89   |
| A2T2    | Box  | T48  | <i>S. cerevisiae</i>               | 876.75  | 3.69               | 282              | 97.3    |
| A2T4    | Box  | T96  | <i>S. cerevisiae</i>               | 606.72  | 3.57               | 264              | 97.58   |
| A2T5    | Box  | T120 | <i>S. cerevisiae</i>               | 916.47  | 3.85               | 307              | 97.08   |
| B2T0    | Box  | T0   | <i>S. cerevisiae_T.delbrueckii</i> | 796.18  | 3.83               | 286              | 97.29   |
| B2T2    | Box  | T48  | <i>S. cerevisiae_T.delbrueckii</i> | 737.38  | 3.38               | 242              | 97.62   |
| B2T4    | Box  | T96  | <i>S. cerevisiae_T.delbrueckii</i> | 736.75  | 3.15               | 233              | 97.7    |
| B2T5    | Box  | T120 | <i>S. cerevisiae_T.delbrueckii</i> | 819.03  | 3.65               | 288              | 97.4    |
| C2T0    | Box  | T0   | <i>Non_inoculated</i>              | 982.6   | 4.5                | 403              | 96.27   |
| C2T2    | Box  | T48  | <i>Non_inoculated</i>              | 785.65  | 3.35               | 303              | 97.09   |
| C2T4    | Box  | T96  | <i>Non_inoculated</i>              | 1098.38 | 4.18               | 393              | 96.19   |

---

|             |     |      |                       |                        |                    |                       |                     |
|-------------|-----|------|-----------------------|------------------------|--------------------|-----------------------|---------------------|
| <b>C2T5</b> | Box | T120 | <i>Non_inoculated</i> | 826.95                 | 3.21               | 298                   | 97.03               |
|             |     |      | <b>Average</b>        | <b>817.28 ± 246.85</b> | <b>3.53 ± 0.59</b> | <b>292.18 ± 62.52</b> | <b>97.22 ± 0.62</b> |

---



### S3. Bacterial community of fermented cocoa beans

| Samples        | Type | Time | Condition                          | Chao1                  | Shannon index (H') | Observed species      | ESC (%)             |
|----------------|------|------|------------------------------------|------------------------|--------------------|-----------------------|---------------------|
| A1T0           | Box  | T0   | <i>S. cerevisiae</i>               | 636.25                 | 4.13               | 184                   | 87.06               |
| A1T2           | Box  | T48  | <i>S. cerevisiae</i>               | 534.11                 | 4.18               | 128                   | 91.75               |
| A1T4           | Box  | T96  | <i>S. cerevisiae</i>               | 282.14                 | 3.73               | 124                   | 92.14               |
| A1T5           | Box  | T120 | <i>S. cerevisiae</i>               | 274                    | 2.48               | 91                    | 94.15               |
| C1T0           | Box  | T0   | <i>Non_inoculated</i>              | 502.8                  | 3.16               | 120                   | 91.56               |
| C1T2           | Box  | T48  | <i>Non_inoculated</i>              | 473.11                 | 4.6                | 122                   | 92.33               |
| C1T4           | Box  | T96  | <i>Non_inoculated</i>              | 453.93                 | 3.71               | 135                   | 90.89               |
| C1T5           | Box  | T120 | <i>Non_inoculated</i>              | 308.57                 | 2.35               | 105                   | 92.71               |
| A3T0           | Heap | T0   | <i>S. cerevisiae</i>               | 296                    | 2.65               | 111                   | 92.81               |
| A3T2           | Heap | T48  | <i>S. cerevisiae</i>               | 626.2                  | 4.72               | 166                   | 88.69               |
| A3T4           | Heap | T96  | <i>S. cerevisiae</i>               | 809.5                  | 4                  | 154                   | 88.97               |
| A3T5           | Heap | T120 | <i>S. cerevisiae</i>               | 670.23                 | 4.17               | 166                   | 88.97               |
| B1T0           | Box  | T0   | <i>S. cerevisiae_T.delbrueckii</i> | 315.89                 | 3.04               | 128                   | 91.85               |
| B1T2           | Box  | T48  | <i>S. cerevisiae_T.delbrueckii</i> | 332                    | 4.16               | 146                   | 91.08               |
| B1T4           | Box  | T96  | <i>S. cerevisiae_T.delbrueckii</i> | 433.18                 | 3.71               | 142                   | 90.41               |
| B1T5           | Box  | T120 | <i>S. cerevisiae_T.delbrueckii</i> | 529.46                 | 3.4                | 141                   | 90.32               |
| B3T0           | Heap | T0   | <i>S. cerevisiae_T.delbrueckii</i> | 354.35                 | 2.72               | 124                   | 91.47               |
| B3T2           | Heap | T48  | <i>S. cerevisiae_T.delbrueckii</i> | 501.2                  | 4.36               | 151                   | 90.12               |
| B3T4           | Heap | T96  | <i>S. cerevisiae_T.delbrueckii</i> | 372                    | 3.57               | 123                   | 91.95               |
| B3T5           | Heap | T120 | <i>S. cerevisiae_T.delbrueckii</i> | 475.79                 | 4.75               | 166                   | 89.55               |
| B3T6           | Heap | T144 | <i>S. cerevisiae_T.delbrueckii</i> | 657.05                 | 5.47               | 202                   | 86.39               |
| C3T0           | Heap | T0   | <i>Non_inoculated</i>              | 247                    | 2.91               | 103                   | 93.86               |
| C3T2           | Heap | T48  | <i>Non_inoculated</i>              | 347.13                 | 3.66               | 124                   | 91.85               |
| C3T4           | Heap | T96  | <i>Non_inoculated</i>              | 396                    | 3.69               | 129                   | 91.37               |
| C3T5           | Heap | T120 | <i>Non_inoculated</i>              | 771.91                 | 4.19               | 155                   | 88.78               |
| A2T0           | Box  | T0   | <i>S. cerevisiae</i>               | 587                    | 3.51               | 137                   | 90.41               |
| A2T2           | Box  | T48  | <i>S. cerevisiae</i>               | 394                    | 4.27               | 124                   | 92.23               |
| A2T4           | Box  | T96  | <i>S. cerevisiae</i>               | 275.67                 | 3.42               | 110                   | 93.19               |
| A2T5           | Box  | T120 | <i>S. cerevisiae</i>               | 500.13                 | 3.97               | 115                   | 92.43               |
| B2T0           | Box  | T0   | <i>S. cerevisiae_T.delbrueckii</i> | 1003.43                | 3.55               | 147                   | 89.45               |
| B2T2           | Box  | T48  | <i>S. cerevisiae_T.delbrueckii</i> | 284.08                 | 4.31               | 114                   | 93.58               |
| B2T4           | Box  | T96  | <i>S. cerevisiae_T.delbrueckii</i> | 370.8                  | 3.02               | 108                   | 93                  |
| B2T5           | Box  | T120 | <i>S. cerevisiae_T.delbrueckii</i> | 300.56                 | 3.99               | 125                   | 92.33               |
| C2T0           | Box  | T0   | <i>Non_inoculated</i>              | 400.09                 | 3.27               | 120                   | 92.43               |
| C2T2           | Box  | T48  | <i>Non_inoculated</i>              | 635.91                 | 4.28               | 149                   | 90.03               |
| C2T4           | Box  | T96  | <i>Non_inoculated</i>              | 448.1                  | 3.9                | 116                   | 92.14               |
| C2T5           | Box  | T120 | <i>Non_inoculated</i>              | 346.91                 | 3.21               | 108                   | 93                  |
| <b>Average</b> |      |      |                                    | <b>463.42 ± 172.66</b> | <b>3.73 ± 0.68</b> | <b>132.78 ± 23.78</b> | <b>91.22 ± 1.83</b> |
